# Supplementary material for: Environmental spaces for palsas and peat plateaus are disappearing at a circumpolar scale
Source: Copernicus journal article supplement (doi:10.5194/tc-17-3157-2023), 2023-08-08
Supplement: Supplementary file 2 [file tc-17-3157-2023-supplement.zip]

Archive with 3 entries (3 files):
- Supplementary material.pdf
- Supplementary materials landform observations.csv
- tc-17-3157-2023-supplement-title-page.pdf
