# Supplementary material for: Environmental spaces for palsas and peat plateaus are disappearing at a circumpolar scale
Source: Copernicus journal article supplement (doi:10.5194/tc-17-3157-2023), 2023-08-08
Supplement: Supplementary file 2 [file tc-17-3157-2023-supplement.zip › Supplementary materials landform observations.csv]

ID: Running numbering for the landform observartions
X & Y: Coordinates of the landform observarions (in WGS84)
Reference: The reference from which the observation was compiled by Leppiniemi et al. (2023). If 'Google_Eart/ArcGIS_Pro' the landform was detectec straight from the satellite images provided in Google Earth and/or ESRI's ArcGIS Pro. List of refecenses are provided in the Supplenmentarary materials (Leppiniemi et al., 2023).
Original_ref: The original reference in which the landfrom is documented for the first time (cited by the study in Reference-column) or which helped to locate landforms from the satellite images (these cases: 'Google_Earth/ArcGIS_Pro' mentioned in Reference column).
ID	X	Y	Reference	Original_ref
1	-164.0243442	59.92952743	Strangl_&_Wildness_2004
2	-164.0383242	59.92212688	Google_Earth/ArcGIS_Pro
3	-163.9461556	59.94462511	Google_Earth/ArcGIS_Pro
4	-163.9595328	59.99712533	Google_Earth/ArcGIS_Pro
5	-163.5374852	60.03003101	Google_Earth/ArcGIS_Pro
6	-163.5173739	60.1473865	Google_Earth/ArcGIS_Pro
7	-163.7593003	60.12166721	Google_Earth/ArcGIS_Pro
8	-157.7204577	63.5749748	Fewster_et_al_2020	Jones_et_al_2017
9	-157.7265638	63.5708921	Fewster_et_al_2020	Treat_et_al_2014
10	-146.478136	63.12726033	Alaska.org: https://www.alaska.org/detail/palsa-mp-41
11	-148.3448511	63.21259339	Reger_et_al_1990
12	-148.2973093	63.09028691	Reger_et_al_1990
13	-148.2855248	63.08962377	Google_Earth/ArcGIS_Pro
14	-148.2966582	63.10044062	Google_Earth/ArcGIS_Pro
15	-148.2884158	63.08265334	Google_Earth/ArcGIS_Pro
16	-148.2793331	63.10312004	Google_Earth/ArcGIS_Pro
17	-156.9380336	62.94641071	Bundtzen_et_al_1993
18	-129.2309252	63.53500099	Mamet_et_al_2017
19	-129.290282	63.499919	Mamet_et_al_2017
20	-129.3494989	63.47197893	Mamet_et_al_2017
21	-129.3160752	63.47721654	Mamet_et_al_2017
22	-129.387172	63.46671985	Mamet_et_al_2017
23	-129.391974	63.4599	Mamet_et_al_2017
24	-129.4012121	63.46212264	Mamet_et_al_2017
25	-129.3981079	63.44766726	Mamet_et_al_2017
26	-129.4226353	63.44750839	Mamet_et_al_2017
27	-129.4321231	63.43490835	Mamet_et_al_2017
28	-129.4157767	63.43738338	Mamet_et_al_2017
29	-129.554821	63.343344	Mamet_et_al_2017
30	-129.5799714	63.34122528	Mamet_et_al_2017
31	-129.6034388	63.33501643	Mamet_et_al_2017
32	-129.6505818	63.39914755	Mamet_et_al_2017
33	-129.6418913	63.42064794	Mamet_et_al_2017
34	-129.5772026	63.4150622	Mamet_et_al_2017
35	-129.5654201	63.42902482	Mamet_et_al_2017
36	-129.6557348	63.37801774	Mamet_et_al_2017
37	-129.739522	63.352759	Mamet_et_al_2017
38	-129.5690674	63.39476036	Mamet_et_al_2017
39	-129.6331647	63.38172831	Mamet_et_al_2017
40	-129.666616	63.39922	Mamet_et_al_2017
41	-129.768772	63.407189	Mamet_et_al_2017
42	-129.76155	63.419712	Mamet_et_al_2017
43	-129.788926	63.390985	Mamet_et_al_2017
44	-129.6980311	63.43644741	Mamet_et_al_2017
45	-129.730694	63.418727	Mamet_et_al_2017
46	-129.7151967	63.38548241	Mamet_et_al_2017
47	-129.6927784	63.39145421	Mamet_et_al_2017
48	-129.7066922	63.31299107	Mamet_et_al_2017
49	-129.752621	63.3315877	Mamet_et_al_2017
50	-129.761173	63.32228095	Mamet_et_al_2017
51	-129.7757658	63.32289387	Mamet_et_al_2017
52	-129.7969464	63.31834182	Mamet_et_al_2017
53	-129.8148542	63.31811764	Mamet_et_al_2017
54	-129.825982	63.31282269	Mamet_et_al_2017
55	-129.8034649	63.31254302	Mamet_et_al_2017
56	-129.7909338	63.30754823	Mamet_et_al_2017
57	-129.7776483	63.31145948	Mamet_et_al_2017
58	-129.791745	63.313883	Mamet_et_al_2017
59	-129.7484506	63.30775088	Mamet_et_al_2017
60	-129.849851	63.309984	Mamet_et_al_2017
61	-129.9130331	63.30361638	Mamet_et_al_2017
62	-129.87321	63.31036	Mamet_et_al_2017
63	-130.0094179	63.26101684	Mamet_et_al_2017
64	-130.0160194	63.25550047	Mamet_et_al_2017
65	-130.2514389	63.1423226	Mamet_et_al_2017
66	-130.2540404	63.12163298	Mamet_et_al_2017
67	-130.2361177	63.14854444	Mamet_et_al_2017
68	-135.2176516	60.50003655	Lewkowicz_&_Coultish_2004
69	-135.220995	60.497018	Lewkowicz_&_Coultish_2004
70	-128.8559456	62.9852924	Google_Earth/ArcGIS_Pro
71	-128.7811545	62.74196496	Fewster_et_al_2020	Robinson_and_Moore_1999
72	-135.2187984	60.48442306	Fewster_et_al_2020	Throop_et_al_2012
73	-130.2208717	63.1623423	Yukon_Landform_Atlas	L.E. Jackson
74	-119.5811292	62.21464268	Google_Earth/ArcGIS_Pro
75	-119.3280814	62.00169984	Google_Earth/ArcGIS_Pro
76	-120.9777917	62.12627787	Fewster_et_al_2020	Zoltai_et_al_2000
77	-119.1331442	58.52696911	Fewster_et_al_2020	Zoltai_et_al_2000
78	-122.7622789	62.24450163	Fewster_et_al_2020	Robinson_and_Moore_1999
79	-122.6095511	62.2785331	Fewster_et_al_2020	Kettles_2003
80	-123.1195581	62.78474189	Fewster_et_al_2020	Kettles_2003
81	-117.2009559	59.19931749	Fewster_et_al_2020	Prater_et_al_2007
82	-117.2143132	59.19403683	Google_Earth/ArcGIS_Pro
83	-117.1855538	59.19350705	Google_Earth/ArcGIS_Pro
84	-122.2222456	61.82855084	Fewster_et_al_2020	Zoltai_et_al_2000
85	-120.7060822	61.19093182	Fewster_et_al_2020	Kettles_2003
86	-120.0401668	61.94900738	Fewster_et_al_2020	Kettles_2003
87	-112.5170614	57.79965449	Fewster_et_al_2020	Beilman_et_al_2003
88	-104.2078761	59.9068371	Sannel_and_Kuhry_2008
89	-110.7925896	63.08181854	Google_Earth/ArcGIS_Pro
90	-110.7956796	63.07470052	Google_Earth/ArcGIS_Pro
91	-94.16432241	57.83388738	Fewster_et_al_2020	Sannel_and_Brown_2010
92	-94.75869263	58.25046423	Fewster_et_al_2020	Sannel_and_Brown_2010
93	-95.25602734	58.24774028	Fewster_et_al_2020	Sannel_and_Brown_2010
94	-95.2489742	59.25657734	Fewster_et_al_2020	Sannel_and_Brown_2010
95	-95.75118986	59.25050303	Fewster_et_al_2020	Sannel_and_Brown_2010
96	-96.97044883	60.57996658	Fewster_et_al_2020	Zoltai_et_al_2000
97	-94.19956107	57.7994145	Fewster_et_al_2020	Kuhry_et_al_2008
98	-94.17101186	57.37204183	Fewster_et_al_2020	Kuhry_et_al_2008
99	-95.74967229	58.75007052	Fewster_et_al_2020	Sannel_and_Brown_2010
100	-98.16256032	55.46324127	Fewster_et_al_2020	Camill_2009
101	-94.15803857	57.07475322	Fewster_et_al_2020	Dredge_&_Mott_2003
102	-95.15797869	57.69703134	Fewster_et_al_2020	Dredge_&_Mott_2003
103	-88.50662	55.293248	Google_Earth/ArcGIS_Pro
104	-88.494389	55.286852	Google_Earth/ArcGIS_Pro
105	-88.9020864	54.215539	Tam_et_al_2014
106	-88.8612751	54.2252801	Tam_et_al_2014
107	-77.650147	53.645019	Thibault_&_Payette_2009
108	-77.60041511	53.63706899	Thibault_&_Payette_2009
109	-77.70900894	55.21897439	Arlen-Pouliot_&_Bihry_2005
110	-77.7175456	55.226037	Arlen-Pouliot_&_Bihry_2005
111	-77.711236	55.21244	Arlen-Pouliot_&_Bihry_2005
112	-83.337115	52.8025782	Pironkova_2017
113	-77.695867	55.226158	Fillion_et_al_2014
114	-77.686869	55.224255	Fillion_et_al_2014
115	-77.683106	55.222029	Fillion_et_al_2014
116	-77.690657	55.208971	Google_Earth/ArcGIS_Pro
117	-77.49363741	55.32838411	Wang_&_Roulet_2017
118	-84.643731	54.56777283	Fewster_et_al_2020	Railton_and_Sparling_1970
119	-77.87645593	55.02795394	Fewster_et_al_2020	Dionne_1978
120	-77.89377518	55.03195526	Google_Earth/ArcGIS_Pro
121	-77.87918705	55.01789468	Google_Earth/ArcGIS_Pro
122	-77.84628087	55.05075281	Google_Earth/ArcGIS_Pro
123	-77.69443428	55.21832733	Google_Earth/ArcGIS_Pro
124	-77.73801591	55.20169626	Fewster_et_al_2020	Dionne_1978
125	-77.71741334	55.1992023	Google_Earth/ArcGIS_Pro
126	-93.24480587	58.25420046	Fewster_et_al_2020	Sannel_and_Brown_2010
127	-88.95142346	55.42130473	Fewster_et_al_2020	Holmquist_2014
128	-83.88141386	52.69570149	Fewster_et_al_2020	Ou_et_al_2016
129	-85.66812464	55.19397102	Google_Earth/ArcGIS_Pro
130	-85.70739189	55.18797314	Google_Earth/ArcGIS_Pro
131	-85.69630083	55.20492251	Google_Earth/ArcGIS_Pro
132	-86.11523062	54.9464514	Fewster_et_al_2020	Tam_et_al_2009
133	-84.17198505	54.90236996	Fewster_et_al_2020	Tam_et_al_2009
134	-83.05442134	54.84044509	Fewster_et_al_2020	Tam_et_al_2009
135	-83.05569983	54.83073166	Google_Earth/ArcGIS_Pro
136	-83.06194755	54.8177565	Google_Earth/ArcGIS_Pro
137	-83.03142393	54.82185697	Google_Earth/ArcGIS_Pro
138	-86.84732049	55.68446936	Google_Earth/ArcGIS_Pro
139	-85.95520856	55.46447781	Google_Earth/ArcGIS_Pro
140	-85.99946194	55.42888866	Google_Earth/ArcGIS_Pro
141	-86.48824229	55.73305892	Fewster_et_al_2020	Tam_et_al_2009
142	-92.48583532	57.01300734	Fewster_et_al_2020	Tarnocai_2011
143	-77.66692322	55.33307056	Fewster_et_al_2020	Arlen-Pouliot_and_Bhiry_2005
144	-77.70947298	53.72024683	Fewster_et_al_2020	Thibault_and_Payette_2009
145	-77.70297237	53.64066991	Fewster_et_al_2020	Thibault_and_Payette_2009
146	-77.67498025	55.23123682	Fewster_et_al_2020	Lamarre_et_al_2012
147	-92.75010598	57.24956509	Fewster_et_al_2020	Sannel_and_Brown_2010
148	-93.75000319	57.25012781	Fewster_et_al_2020	Sannel_and_Brown_2010
149	-93.25020823	57.74994098	Fewster_et_al_2020	Sannel_and_Brown_2010
150	-85.65384298	55.19617667	Fewster_et_al_2020	Tam_et_al_2009
151	-84.25512769	55.08100848	Fewster_et_al_2020	Tam_et_al_2009
152	-83.78002092	54.94795569	Fewster_et_al_2020	Tam_et_al_2009
153	-89.50899045	56.3650774	Fewster_et_al_2020	Tam_et_al_2009
154	-89.3089837	56.50702721	Fewster_et_al_2020	Tam_et_al_2009
155	-88.6256537	56.43123306	Fewster_et_al_2020	Tam_et_al_2009
156	-85.97379539	55.46109629	Fewster_et_al_2020	Tam_et_al_2009
157	-87.56617925	55.62982747	Fewster_et_al_2020	Tam_et_al_2009
158	-88.80022759	55.98294327	Fewster_et_al_2020	Riley_2011
159	-77.561	55.305	Bhiry_&_Robert_2006
160	-75.917945	56.183532	Payette_et_al_2004
161	-76.09037388	56.61411143	Calmels_&_Allard_2008
162	-76.24266692	57.74746612	Jean_&_Payette_2014
163	-76.11157721	57.73959639	Jean_&_Payette_2014
164	-76.096689	57.739799	Jean_&_Payette_2014
165	-75.91025768	56.19661252	Google_Earth/ArcGIS_Pro
166	-75.94492436	56.20520164	Google_Earth/ArcGIS_Pro
167	-76.14746859	57.75970719	Google_Earth/ArcGIS_Pro
168	-76.00240719	57.75033807	Fewster_et_al_2020	Cyr_and_Payette_2010
169	-76.69911262	55.9348184	Fewster_et_al_2020	Dionne_1978
170	-76.25482223	57.75001482	Fewster_et_al_2020	Lavoie_and_Payette_1995
171	-76.26852404	57.75525321	Google_Earth/ArcGIS_Pro
172	-76.28610632	57.7558681	Google_Earth/ArcGIS_Pro
173	-76.28611344	57.74865867	Google_Earth/ArcGIS_Pro
174	-76.26928672	57.74675822	Google_Earth/ArcGIS_Pro
175	-76.33303319	57.75006194	Fewster_et_al_2020	Vallee_and_Payette_2007
176	-65.9249722	58.66702982	Fewster_et_al_2020	An_and_Allard_1994
177	-76.13399317	56.63262785	Fewster_et_al_2020	Allard_&_Seguin_1987
178	-74.45496506	56.34794493	Fewster_et_al_2020	Langlais_2016
179	-57.00415236	53.71391058	Way_et_al_2018
180	-58.83523047	53.98584493	Way_et_al_2018
181	-58.84891158	53.98436817	Way_et_al_2018
182	-57.11922639	51.45652631	Way_et_al_2018
183	-56.41374959	51.75894404	Way_et_al_2018
184	-57.24000009	53.94701377	Way_&_Lewkowicz_2018
185	-57.13309	53.73574	Way_&_Lewkowicz_2018
186	-57.1658176	51.50021823	Fewster_et_al_2020	Dionne_and_Richard_2006
187	-57.15397902	51.49913604	Google_Earth/ArcGIS_Pro
188	9.378214252	62.1484607	Ferbar_2009
189	9.373872164	62.14759142	Ferbar_2009
190	9.310755277	62.34249809	Mathews_et_al_1997
191	75.678028	63.17534	Kosykh_et_al_2008
192	75.638626	63.179188	Kosykh_et_al_2008
193	75.618119	63.158573	Kosykh_et_al_2008
194	75.728249	63.200079	Kosykh_et_al_2008
195	75.368877	63.081976	Kosykh_et_al_2008
196	75.335445	63.082084	Kosykh_et_al_2008
197	75.377607	63.050975	Kosykh_et_al_2008
198	75.362157	63.064216	Kosykh_et_al_2008
199	75.70812062	63.07778891	Google_Earth/ArcGIS_Pro	Terentiva_et_al_2016
200	75.73960021	63.01881234	Google_Earth/ArcGIS_Pro	Terentiva_et_al_2016
201	75.63098528	62.97326203	Google_Earth/ArcGIS_Pro	Terentiva_et_al_2016
202	75.58476165	63.13450372	Google_Earth/ArcGIS_Pro	Terentiva_et_al_2016
203	75.71241243	63.21921738	Kotonatova_et_al_2018
204	71.32305441	63.511676	Google_Earth/ArcGIS_Pro
205	75.52125623	63.22925016	Google_Earth/ArcGIS_Pro
206	101.9711555	60.90543898	Google_Earth/ArcGIS_Pro
207	101.9535706	60.90263933	Vasil'chuk_et_al_2013c
208	101.8994208	60.9071904	Vasil'chuk_et_al_2013c
209	101.903047	60.91744584	Vasil'chuk_et_al_2013c
210	134.8069203	53.15733201	Vasil'chuk_et_al_2014
211	134.8028423	53.14437354	Vasil'chuk_et_al_2014
212	139.6963424	59.71922896	Vasil'chuk_et_al_2014
213	139.7824845	59.60236488	Vasil'chuk_et_al_2014
214	143.3390587	49.47693576	Vasil'chuk_et_al_2014
215	143.3292555	49.48672075	Vasil'chuk_et_al_2014
216	143.4141325	49.54476156	Vasil'chuk_et_al_2014
217	141.2333786	51.99227982	Vasil'chuk_et_al_2014
218	141.2459973	51.98142507	Google_Earth/ArcGIS_Pro
219	141.247073	52.00058447	Google_Earth/ArcGIS_Pro
220	141.1898774	51.94497902	Google_Earth/ArcGIS_Pro
221	151.8836883	62.75770639	Google_Earth/ArcGIS_Pro
222	151.8730752	62.76082357	Vasil'chuk_et_al_2014
223	158.2515018	58.00254299	Google_Earth/ArcGIS_Pro
224	158.2576287	58.01682445	Google_Earth/ArcGIS_Pro
225	158.2597855	57.99463317	Google_Earth/ArcGIS_Pro
226	158.2716801	58.00114958	Vasil'chuk_et_al_2014
227	158.2940172	57.95744833	Vasil'chuk_et_al_2014
228	158.2908455	57.95957872	Google_Earth/ArcGIS_Pro
229	158.2992555	57.96290977	Google_Earth/ArcGIS_Pro
230	158.2935631	57.9722373	Google_Earth/ArcGIS_Pro
231	155.8054634	56.07282573	Google_Earth/ArcGIS_Pro
232	155.8245668	56.07798061	Google_Earth/ArcGIS_Pro
233	155.8132263	56.07920231	Vasil'chuk_et_al_2014
234	155.7627276	56.06117198	Vasil'chuk_et_al_2014
235	155.8164975	56.02816506	Vasil'chuk_et_al_2014
236	158.971393	58.37676954	Vasil'chuk_et_al_2014
237	158.9828804	58.37459531	Google_Earth/ArcGIS_Pro
238	158.9867077	58.38303564	Google_Earth/ArcGIS_Pro
239	159.0475852	58.35951497	Google_Earth/ArcGIS_Pro
240	159.0658121	58.36549801	Google_Earth/ArcGIS_Pro
241	159.0538704	58.3625472	Vasil'chuk_et_al_2014
242	-163.454	64.827314	Fewster_et_al_2020	Hunt_et_al_2013
243	-163.9225349	66.58183871	Plug_2003
244	-155.360456	65.18594376	Fewster_et_al_2020	Robinson_and_Moore_1999
245	-157.0371504	65.25570704	Fewster_et_al_2020	Kanevskiy_et_al_2014
246	-149.6486979	68.62069613	Outcalt_et_al_1985
247	-149.620603	68.62725465	Outcalt_et_al_1985
248	-150.0759857	69.48832542	Eisner_et al_2003
249	-150.0704181	69.488535	Eisner_et al_2003
250	-149.7365095	67.62580373	Outcalt_&_Nelson_1984
251	-143.633	69.717	Tsuyuzaki_et_al_2008
252	-134.3151182	65.62068369	Fewster_et_al_2020	Zoltai_et_al_2000
253	-133.1572852	66.04188386	Fewster_et_al_2020	Zoltai_et_al_2000
254	-133.4339057	66.59453531	Fewster_et_al_2020	Zoltai_et_al_2000
255	-135.3448665	66.82597407	Fewster_et_al_2020	Zoltai_et_al_2000
256	-134.2534918	67.10623684	Fewster_et_al_2020	Zoltai_et_al_2000
257	-137.2374512	67.12534063	Fewster_et_al_2020	Zoltai_et_al_2000
258	-128.3486182	66.09625513	Fewster_et_al_2020	Zoltai_et_al_2000
259	-128.3454457	66.30988373	Google_Earth/ArcGIS_Pro
260	-133.2430614	67.66360719	Google_Earth/ArcGIS_Pro
261	-133.6378626	67.6508483	Fewster_et_al_2020	Zoltai_et_al_2000
262	-132.691058	66.67178959	Fewster_et_al_2020	Zoltai_et_al_2000
263	-132.7167721	66.66907708	Fewster_et_al_2020	Zoltai_et_al_2000
264	-134.5881282	67.32390889	Google_Earth/ArcGIS_Pro
265	-137.4395586	66.43526959	Google_Earth/ArcGIS_Pro
266	-133.7712658	67.49847232	Fewster_et_al_2020	Zoltai_et_al_2000
267	-134.6800942	67.47016837	Fewster_et_al_2020	Zoltai_et_al_2000
268	-134.5932152	67.46595169	Fewster_et_al_2020	Zoltai_et_al_2000
269	-133.7579528	67.79600362	Fewster_et_al_2020	Kettles_2003
270	-133.7303923	66.77035565	Fewster_et_al_2020	Zoltai_et_al_2000
271	-129.8321785	65.92981324	Fewster_et_al_2020	Zoltai_et_al_2000
272	-137.2840187	67.08044094	Fewster_et_al_2020	Zoltai_et_al_2000
273	-137.2189336	67.12041177	Fewster_et_al_2020	Zoltai_et_al_2000
274	-133.4501035	68.28278697	Fewster_et_al_2020	Kettles_2003
275	-133.3949584	68.34325639	Fewster_et_al_2020	Kettles_2003
276	-137.4735223	64.518268	Yukon_Landform_Atlas	NAPL A28455-23, NRCAN
277	-137.4655855	64.5150321	Yukon_Landform_Atlas	NAPL A28455-23, NRCAN
278	-138.3654622	64.6804915	Yukon_Landform_Atlas	NAPL A18137-49, NRCAN
279	-125.4918195	65.43858845	Fewster_et_al_2020	Zoltai_et_al_2000
280	-127.0093676	65.2085904	Fewster_et_al_2020	Tarnocai_2011
281	-125.4993222	65.26929627	Fewster_et_al_2020	Zoltai_et_al_2000
282	-124.2002142	64.60084542	Fewster_et_al_2020	Beilman_et_al_2003
283	-18.53398	65.082086	Saemundsson_et_al_2012
284	-18.541038	65.103144	Saemundsson_et_al_2012
285	-18.543648	65.10272	Saemundsson_et_al_2012
286	-18.56053	65.089497	Ottósson_et_al_2016
287	-18.534543	65.068137	Ottósson_et_al_2016
288	-18.536501	65.126685	Ottósson_et_al_2016
289	-18.41358324	65.07950603	Ottósson_et_al_2016
290	-18.40814906	65.08284427	Ottósson_et_al_2016
291	-18.41585465	65.08480267	Ottósson_et_al_2016
292	-18.42039672	65.08693452	Ottósson_et_al_2016
293	-18.58636217	65.05924542	Ottósson_et_al_2016
294	-18.5684801	65.09868944	Ottósson_et_al_2016
295	-18.5721445	65.0528594	Ottósson_et_al_2016
296	-18.5526307	65.05247816	Ottósson_et_al_2016
297	-18.55765388	65.03131869	Ottósson_et_al_2016
298	-18.58122307	65.03042848	Ottósson_et_al_2016
299	-18.5578746	65.0236935	Ottósson_et_al_2016
300	-18.55923797	65.0163671	Ottósson_et_al_2016
301	-18.57366901	65.01612085	Ottósson_et_al_2016
302	-18.62354126	65.02041372	Ottósson_et_al_2016
303	-18.64412535	65.02421471	Ottósson_et_al_2016
304	-18.98634744	65.01119433	Ottósson_et_al_2016
305	-18.99252803	65.01714338	Ottósson_et_al_2016
306	-19.00948593	65.05248765	Ottósson_et_al_2016
307	-18.75945176	65.18297318	Ottósson_et_al_2016
308	-18.80397458	65.1877473	Ottósson_et_al_2016
309	-18.67891447	65.18536338	Ottósson_et_al_2016
310	-18.72662722	65.18721483	Ottósson_et_al_2016
311	-19.46649302	65.07436835	Ottósson_et_al_2016
312	-19.35763776	65.06262474	Ottósson_et_al_2016
313	-19.4591043	64.99116743	Ottósson_et_al_2016
314	-19.4955224	65.01016531	Ottósson_et_al_2016
315	-19.8232958	65.21029205	Ottósson_et_al_2016
316	-19.8362391	65.12340245	Ottósson_et_al_2016
317	-19.67389299	64.96013061	Ottósson_et_al_2016
318	-19.40213525	64.91979697	Ottósson_et_al_2016
319	-15.77226427	64.78454189	Ottósson_et_al_2016
320	-15.8233728	64.78336918	Ottósson_et_al_2016
321	-15.77918999	64.79350589	Ottósson_et_al_2016
322	-15.76142366	64.83099605	Ottósson_et_al_2016
323	-15.90877067	64.85146298	Ottósson_et_al_2016
324	-15.92068457	64.81382191	Ottósson_et_al_2016
325	-15.36251863	64.90902222	Ottósson_et_al_2016
326	-15.3528343	64.91730405	Ottósson_et_al_2016
327	-15.36545267	64.95538872	Ottósson_et_al_2016
328	-15.37436947	64.9755884	Ottósson_et_al_2016
329	-15.22986329	65.14503991	Ottósson_et_al_2016
330	-15.34027246	65.21108704	Ottósson_et_al_2016
331	-15.56689097	65.25737545	Ottósson_et_al_2016
332	-15.55718789	65.26128276	Ottósson_et_al_2016
333	-18.65209131	64.63652056	Ottósson_et_al_2016
334	-18.71270235	64.60841408	Ottósson_et_al_2016
335	-18.71781282	64.62159459	Ottósson_et_al_2016
336	-18.77366306	64.57575343	Ottósson_et_al_2016
337	-18.81733779	64.53667339	Ottósson_et_al_2016
338	-18.7786268	64.55347116	Ottósson_et_al_2016
339	-18.8274512	64.51245925	Ottósson_et_al_2016
340	21.080839	68.842673	Backe_2014
341	21.079363	68.841416	Backe_2014
342	21.045832	68.841543	Backe_2014
343	21.043283	68.842327	Backe_2014
344	21.039633	68.84504	Backe_2014
345	21.028033	68.845202	Backe_2014
346	21.013327	68.848864	Backe_2014
347	21.024679	68.849843	Backe_2014
348	21.079381	68.853037	Backe_2014
349	20.97456	68.854184	Backe_2014
350	20.98556	68.853229	Backe_2014
351	20.999333	68.841206	Backe_2014
352	21.014228	68.83711	Backe_2014
353	21.057283	68.834779	Backe_2014
354	21.062189	68.832921	Backe_2014
355	21.056123	68.833305	Backe_2014
356	21.061557	68.819916	Backe_2014
358	21.093615	68.823105	Backe_2014
359	21.164134	68.827088	Backe_2014
360	21.183259	68.803172	Backe_2014
361	21.192042	68.799791	Backe_2014
362	21.200201	68.794608	Backe_2014
363	21.196158	68.784803	Backe_2014
364	21.210818	68.782416	Backe_2014
365	21.246577	68.775681	Backe_2014
366	21.245232	68.774416	Backe_2014
368	21.256239	68.758153	Backe_2014
369	21.235466	68.765845	Backe_2014
370	21.264229	68.768398	Backe_2014
371	21.306214	68.758157	Backe_2014
372	20.987985	68.770261	Backe_2014
373	20.987209	68.783788	Backe_2014
374	20.334857	68.808989	Backe_2014
375	20.391405	68.797255	Backe_2014
376	20.476345	68.780764	Backe_2014
377	20.461102	68.790472	Backe_2014
378	20.502342	68.744192	Backe_2014
379	20.179297	68.571706	Backe_2014
380	20.172928	68.570633	Backe_2014
381	20.357375	68.572256	Backe_2014
382	20.275751	68.571789	Backe_2014
383	20.14167	68.53948	Backe_2014
384	20.130678	68.533412	Backe_2014
385	20.317667	68.516763	Backe_2014
386	20.278552	68.528431	Backe_2014
387	20.910062	68.465878	Backe_2014
388	20.882027	68.470539	Backe_2014
389	20.882152	68.464143	Backe_2014
390	20.903735	68.464017	Backe_2014
391	20.894642	68.466572	Backe_2014
392	20.89873	68.457818	Backe_2014
393	20.920537	68.477279	Backe_2014
394	20.907262	68.474346	Backe_2014
395	21.49228	68.297802	Backe_2014
396	21.54565	68.337183	Backe_2014
397	21.599	68.349895	Backe_2014
398	21.591011	68.347465	Backe_2014
399	19.612549	68.351201	Backe_2014
400	19.608079	68.357062	Backe_2014
401	19.59867	68.353817	Backe_2014
402	19.58126	68.358578	Backe_2014
403	18.979529	68.343236	Backe_2014
404	19.781023	68.199067	Backe_2014
405	19.773653	68.198082	Backe_2014
406	20.515258	68.232551	Backe_2014
407	20.517896	68.227601	Backe_2014
408	20.510256	68.2383	Backe_2014
409	20.47154	68.239128	Backe_2014
410	20.710368	68.306448	Backe_2014
411	20.717641	68.311653	Backe_2014
412	20.702031	68.311036	Backe_2014
413	20.76167	68.312812	Backe_2014
414	20.696631	68.528581	Backe_2014
415	20.712395	68.523706	Backe_2014
416	20.567307	68.541501	Backe_2014
417	20.865467	68.541414	Backe_2014
418	20.895732	68.540692	Backe_2014
419	20.876424	68.512546	Backe_2014
420	18.714567	67.659553	Backe_2014
421	18.69145	67.662948	Backe_2014
422	18.696059	67.670492	Backe_2014
423	18.842282	67.22618	Backe_2014
424	19.413969	67.515262	Backe_2014
425	19.392668	67.507773	Backe_2014
426	18.748002	67.228712	Backe_2014
427	16.814556	67.303866	Backe_2014
428	16.805341	67.308494	Backe_2014
429	16.659935	67.308566	Backe_2014
430	15.497318	66.099995	Backe_2014
431	15.634082	66.218375	Backe_2014
432	24.1671	68.891285	Backe_2014
433	24.162662	68.892578	Backe_2014
434	24.168796	68.893545	Backe_2014
435	24.16312612	68.90114165	Backe_2014
436	24.1879221	68.89578109	Backe_2014
437	24.195206	68.90028	Backe_2014
438	24.2016	68.902468	Backe_2014
439	24.18104	68.801408	Backe_2014
440	24.190909	68.803434	Backe_2014
441	24.205044	68.800783	Backe_2014
442	24.19018718	68.79349525	Backe_2014
443	24.215636	68.77870503	Backe_2014
444	23.269985	68.73518	Backe_2014
445	23.273128	68.742457	Backe_2014
446	23.275342	68.751472	Backe_2014
447	23.2947704	68.7497	Backe_2014
448	23.273847	68.760378	Backe_2014
449	23.279674	68.761748	Backe_2014
450	23.298936	68.755287	Backe_2014
451	23.313349	68.766259	Backe_2014
452	23.31166	68.770204	Backe_2014
453	23.334776	68.772829	Backe_2014
454	23.36974738	68.78105773	Backe_2014
455	23.77222086	68.95372131	Backe_2014
456	23.943757	68.892276	Backe_2014
457	23.956601	68.892394	Backe_2014
458	23.26997907	68.6636164	Backe_2014
459	23.33072067	68.71960867	Backe_2014
460	23.232637	68.66723316	Backe_2014
461	22.398981	68.796537	Backe_2014
462	22.38128595	68.741497	Backe_2014
463	23.09970211	68.88229551	Backe_2014
464	23.16616853	68.90813287	Backe_2014
465	23.10622993	68.87539535	Backe_2014
466	24.87013	70.212649	Backe_2014
467	24.997717	70.122479	Backe_2014
468	25.01084574	70.09968289	Backe_2014
469	24.87675	70.187743	Backe_2014
470	24.451749	69.089168	Backe_2014
471	24.4415	69.090459	Backe_2014
472	24.442047	69.098435	Backe_2014
473	24.439908	69.100076	Backe_2014
474	24.50093079	69.64292816	Backe_2014
475	22.3166923	69.01495355	Backe_2014
476	22.37903163	69.01512976	Backe_2014
477	22.449208	68.995393	Backe_2014
478	22.44493831	69.01262878	Backe_2014
479	20.994833	68.883609	Backe_2014
480	25.00364481	70.10987616	Borge_et_al_2017
481	25.05038056	70.07350168	Borge_et_al_2017
482	25.06382331	70.05952262	Borge_et_al_2017
483	25.08354905	70.04821042	Borge_et_al_2017
484	25.11068112	70.0512815	Borge_et_al_2017
485	25.09797989	70.06031915	Borge_et_al_2017
486	25.13984279	70.05636257	Borge_et_al_2017
487	24.07460961	69.38515992	Borge_et_al_2017
488	24.0905085	69.38756647	Borge_et_al_2017
489	24.09575027	69.37994992	Borge_et_al_2017
490	24.11213148	69.37751607	Borge_et_al_2017
491	24.12181889	69.37029174	Borge_et_al_2017
492	24.1462301	69.3741414	Borge_et_al_2017
493	24.19138808	69.40847071	Borge_et_al_2017
494	24.18200356	69.41210832	Borge_et_al_2017
495	24.1787368	69.41904369	Borge_et_al_2017
496	24.18376165	69.42836707	Borge_et_al_2017
497	24.20086244	69.43296659	Borge_et_al_2017
498	24.29381999	68.81505414	Borge_et_al_2017
499	24.24398547	68.80226286	Borge_et_al_2017
500	24.24991092	68.81078904	Borge_et_al_2017
501	24.25731451	68.82149072	Borge_et_al_2017
502	24.38499974	68.78617584	Borge_et_al_2017
503	24.35901608	68.79507924	Borge_et_al_2017
504	23.07743274	68.85869515	Borge_et_al_2017
505	23.129556	68.85861822	Borge_et_al_2017
506	23.15077199	68.84902625	Borge_et_al_2017
507	22.97796891	68.80900853	Borge_et_al_2017
508	22.276916	69.00740764	Borge_et_al_2017
509	22.23499893	68.98616217	Borge_et_al_2017
510	22.21655086	68.9923038	Borge_et_al_2017
511	22.17892596	68.97996763	Borge_et_al_2017
512	22.14023621	68.98578819	Borge_et_al_2017
513	22.163691	68.99640168	Borge_et_al_2017
514	22.2204991	68.96420995	Borge_et_al_2017
515	22.255906	68.96961077	Borge_et_al_2017
516	22.2899969	68.97550577	Borge_et_al_2017
517	21.79558426	68.84494087	Metsähallitus_2002
518	21.81686594	68.85385787	Metsähallitus_2002
520	21.54582863	68.8937012	Metsähallitus_2002
521	21.076501	68.879308	Metsähallitus_2002
522	21.070325	68.875328	Metsähallitus_2002
523	21.10039552	68.86416942	Metsähallitus_2002
524	21.12218321	68.86088075	Metsähallitus_2002
525	21.27638226	68.78529955	Metsähallitus_2002
526	21.70258667	69.00769696	Metsähallitus_2002
527	21.66443165	69.01028784	Metsähallitus_2002
529	21.61928881	69.01022671	Metsähallitus_2002
530	21.64582	69.022816	Metsähallitus_2002
531	21.750735	68.982368	Metsähallitus_2002
532	21.487786	69.013094	Metsähallitus_2002
533	21.512525	69.008011	Metsähallitus_2002
534	21.26402426	68.81534804	Metsähallitus_2002
535	21.521056	68.82463236	Metsähallitus_2002
536	21.704287	68.638837	Metsähallitus_2002
537	21.73320378	68.64846707	Metsähallitus_2002
538	21.83830486	68.62463224	Metsähallitus_2002
539	21.83057667	68.61216511	Metsähallitus_2002
540	21.710348	68.595547	Metsähallitus_2002
541	21.93419394	68.58205442	Metsähallitus_2002
543	22.363351	68.486684	Metsähallitus_2002
544	22.3479357	68.49804656	Metsähallitus_2002
545	22.400319	68.52995	Metsähallitus_2002
546	22.36039867	68.52432072	Metsähallitus_2002
547	22.207617	68.834191	Metsähallitus_2002
548	23.74776906	68.65823042	Metsähallitus_2002
549	21.302637	69.080933	Metsähallitus_2002
550	23.95431469	68.26759138	Metsähallitus_2002
551	24.53717085	68.51462846	Metsähallitus_2002
552	23.92640774	68.71592981	Metsähallitus_2002
553	24.03165935	68.79835928	Metsähallitus_2002
554	24.11828141	68.76141191	Metsähallitus_2002
556	21.83956827	68.95725459	Metsähallitus_2002
557	21.83642347	68.96441307	Metsähallitus_2002
558	21.82299557	68.96630728	Metsähallitus_2002
559	21.8351406	69.00319272	Metsähallitus_2002
560	21.59453955	68.94446635	Metsähallitus_2002
561	21.58869565	68.94667727	Metsähallitus_2002
562	21.57896015	68.95128077	Metsähallitus_2002
563	21.48475335	68.93939867	Metsähallitus_2002
564	21.47272857	68.75172993	Metsähallitus_2002
565	21.45659126	68.78766766	Metsähallitus_2002
566	21.4636326	68.78600955	Metsähallitus_2002
567	21.51698301	68.80754399	Metsähallitus_2002
568	21.55102219	68.8160939	Metsähallitus_2002
570	21.57509975	68.83876507	Metsähallitus_2002
571	21.40763137	68.8524885	Metsähallitus_2002
572	21.42445551	68.84487585	Metsähallitus_2002
573	21.39447964	68.83800873	Metsähallitus_2002
574	21.46234156	68.84449449	Metsähallitus_2002
575	21.47843043	68.86598119	Metsähallitus_2002
576	21.48502566	68.85577961	Metsähallitus_2002
577	21.55409325	68.90071742	Metsähallitus_2002
578	21.59609492	68.90109815	Metsähallitus_2002
579	21.54937928	68.88360037	Metsähallitus_2002
580	21.62499614	68.90633863	Metsähallitus_2002
581	22.19888435	68.81777511	Metsähallitus_2002
582	22.21897763	68.82228748	Metsähallitus_2002
583	22.25245621	68.83872906	Metsähallitus_2002
584	22.27911101	68.82670297	Metsähallitus_2002
585	22.25718306	68.8262098	Metsähallitus_2002
587	22.27751046	68.80644587	Metsähallitus_2002
588	22.25833067	68.81109111	Metsähallitus_2002
589	22.26124111	68.79438209	Metsähallitus_2002
590	22.0274444	68.86440072	Metsähallitus_2002
591	22.01048111	68.82936471	Metsähallitus_2002
593	21.86137499	68.81582888	Metsähallitus_2002
594	21.8571252	68.82174528	Metsähallitus_2002
595	21.97904343	68.84008932	Metsähallitus_2002
596	22.02319853	68.80415684	Metsähallitus_2002
597	22.51756783	68.68826195	Metsähallitus_2002
598	22.4161536	68.58644753	Metsähallitus_2002
599	24.29862677	68.42508746	Metsähallitus_2002
600	22.26270946	68.60865484	Metsähallitus_2002
601	22.46030587	68.66838807	Metsähallitus_2002
602	22.50513211	68.67623218	Metsähallitus_2002
603	23.96231812	68.68463473	Metsähallitus_2002
605	23.92816489	68.7169392	Metsähallitus_2002
606	24.11603144	68.76164182	Metsähallitus_2002
607	23.76158033	68.75020262	Metsähallitus_2002
608	24.01419288	68.78135889	Metsähallitus_2002
609	22.31575865	68.48770902	Metsähallitus_2002
610	22.38545052	68.52733877	Metsähallitus_2002
611	22.33894833	68.51696869	Metsähallitus_2002
612	21.96209235	68.57949536	Metsähallitus_2002
613	21.98672993	68.59359549	Metsähallitus_2002
614	21.83829555	68.61812969	Metsähallitus_2002
615	21.80437616	68.63513319	Metsähallitus_2002
616	21.66710009	68.64862542	Metsähallitus_2002
617	22.1821004	68.8248407	Metsähallitus_2002
618	21.24775871	68.81345762	Metsähallitus_2002
619	21.26100099	68.80518099	Metsähallitus_2002
620	21.16413729	68.86120992	Metsähallitus_2002
621	21.06319016	68.88483937	Metsähallitus_2002
622	21.1157167	68.89190629	Metsähallitus_2002
623	21.67706753	69.00281185	Metsähallitus_2002
624	21.63586883	69.01480234	Metsähallitus_2002
625	21.73002908	69.01001033	Metsähallitus_2002
626	21.57862201	69.02103802	Metsähallitus_2002
627	21.60584601	69.09579778	Metsähallitus_2002
628	21.50907391	68.81687523	Metsähallitus_2002
629	24.25621034	69.38439046	Martin_et_al_2019
630	25.29567144	69.34080911	Martin_et_al_2019
631	18.8733	68.3508	Christiansen_et_al_2010
632	18.9739	68.3472	Christiansen_et_al_2010
633	22.7895583	69.09193133	Göttlich_et_al_1983
634	19.04388889	68.35519444	Patzner_et_al_2020
635	21.23357152	68.79121552	Olvmo_et_al_2020
636	21.21095179	68.79808005	Olvmo_et_al_2020
637	16.86426996	67.27390499	White_et_al_1969
638	18.84932362	67.73095627	Lundqvist_1951
639	19.80872409	68.48608435	Google_Earth/ArcGIS_Pro
640	19.79478686	68.47956951	Google_Earth/ArcGIS_Pro
641	19.75239144	68.48173719	Google_Earth/ArcGIS_Pro
642	19.77623713	68.48370914	Google_Earth/ArcGIS_Pro
643	19.81424295	68.4984356	Google_Earth/ArcGIS_Pro
644	32.9262098	67.83746957	Barcan_2010
645	32.88264731	67.91637007	Barcan_2010
646	32.88090391	67.91735886	Barcan_2010
647	32.810641	67.957264	Barcan_2010
648	32.805792	67.957533	Barcan_2010
649	32.812166	67.959558	Barcan_2010
650	32.985935	67.950408	Google_Earth/ArcGIS_Pro
651	25.847088	70.682771	Backe_2014
652	28.58365925	70.12706023	Backe_2014
653	28.56530054	70.12890077	Backe_2014
654	28.595037	70.130135	Backe_2014
655	29.947965	70.078738	Backe_2014
656	29.952296	70.082929	Backe_2014
657	32.91079759	67.96107587	Barcan_2010
658	32.87459993	67.96564092	Barcan_2010
659	33.24376846	67.97103859	Barcan_2010
660	33.39651368	68.25096872	Barcan_2010
661	33.32229018	68.31603352	Barcan_2010
662	28.3133862	70.12724148	Borge_et_al_2017
663	28.28773343	70.12908588	Borge_et_al_2017
664	28.33704549	70.12420529	Borge_et_al_2017
665	28.32039875	70.13475779	Borge_et_al_2017
666	28.43936948	70.11621669	Borge_et_al_2017
667	28.41835709	70.11022427	Borge_et_al_2017
668	28.47471051	70.12075658	Borge_et_al_2017
669	27.24340798	69.81647834	Metsähallitus_2002
670	27.23409112	69.80437969	Metsähallitus_2002
671	27.24180045	69.82754131	Metsähallitus_2002
672	27.28787712	69.83542302	Metsähallitus_2002
673	26.16814316	69.45261893	Metsähallitus_2002
674	27.87332711	69.43989692	Metsähallitus_2002
675	27.463904	69.706017	Metsähallitus_2002
676	27.35179	69.726277	Metsähallitus_2002
677	27.312106	69.752505	Metsähallitus_2002
678	27.275101	69.764608	Metsähallitus_2002
679	27.287975	69.776112	Metsähallitus_2002
680	27.947479	69.872784	Metsähallitus_2002
681	27.908868	69.841976	Metsähallitus_2002
682	27.94910886	69.92706926	Metsähallitus_2002
683	27.77782	70.005159	Metsähallitus_2002
684	27.617987	70.03415	Metsähallitus_2002
685	27.33766543	69.77788471	Metsähallitus_2002
686	27.42590355	69.78849519	Metsähallitus_2002
687	27.4623256	69.78593004	Metsähallitus_2002
688	27.44397977	69.76556953	Metsähallitus_2002
689	27.32569309	69.67796729	Metsähallitus_2002
690	27.33376742	69.69077709	Metsähallitus_2002
691	27.32612169	69.57144153	Metsähallitus_2002
692	27.32372975	69.60736018	Metsähallitus_2002
693	27.36585684	69.55658115	Metsähallitus_2002
694	27.42446108	69.56595044	Metsähallitus_2002
695	27.59279083	69.68574926	Metsähallitus_2002
696	26.55270147	69.3252914	Metsähallitus_2002
697	26.92759197	69.26183928	Metsähallitus_2002
698	26.89014794	69.26899292	Metsähallitus_2002
699	26.90774994	69.26965549	Metsähallitus_2002
700	26.96386838	69.28838051	Metsähallitus_2002
701	27.08930032	69.27820421	Metsähallitus_2002
702	27.60469053	69.88869283	Metsähallitus_2002
704	25.83799175	69.34204846	Metsähallitus_2002
705	27.23848351	69.82183499	Metsähallitus_2002
706	27.2291699	69.4117629	Metsähallitus_2002
707	27.06194504	69.27625756	Metsähallitus_2002
708	27.44988119	69.34902482	Metsähallitus_2002
709	26.83078534	69.33079236	Metsähallitus_2002
710	26.68193379	69.32674169	Metsähallitus_2002
711	26.64274177	69.35154742	Metsähallitus_2002
712	26.70608003	69.34679315	Metsähallitus_2002
713	26.55333708	69.32496672	Metsähallitus_2002
714	25.6046168	68.78363342	Metsähallitus_2002
715	25.69476202	68.84380226	Metsähallitus_2002
716	26.12219002	69.44726319	Metsähallitus_2002
717	26.13969631	69.45571901	Metsähallitus_2002
719	26.72056542	69.65060625	Metsähallitus_2002
720	26.67638078	69.85585417	Metsähallitus_2002
721	27.1672216	69.8218835	Christiansen_et_al_2010
722	57.44171791	65.76842138	Oksanen_et_al_2003
723	49.88489073	67.26640252	Zhang_et_al_2017
724	56.90832956	67.01559865	Kaverin_et_al_2020
725	61.47483	66.399731	Vasil'chuk_et_al_2013a
726	61.484338	66.402961	Vasil'chuk_et_al_2013a
727	61.470521	66.418301	Google_Earth/ArcGIS_Pro
728	61.443586	66.407847	Google_Earth/ArcGIS_Pro
729	61.41736864	66.39755821	Google_Earth/ArcGIS_Pro
730	61.491619	66.374836	Google_Earth/ArcGIS_Pro
731	61.506447	66.397852	Google_Earth/ArcGIS_Pro
732	61.491737	66.38948	Google_Earth/ArcGIS_Pro
733	61.67090045	66.53115255	Google_Earth/ArcGIS_Pro
734	61.66645682	66.52347315	Vasil'chuk_et_al_2013a
735	61.67815275	66.52174137	Vasil'chuk_et_al_2013a
736	63.81038784	67.03723804	Vasil'chuk_et_al_2013a
737	63.835754	67.027874	Vasil'chuk_et_al_2013a
738	75.450632	64.645834	Loiko_et_al_2017
739	75.44340949	64.64265643	Loiko_et_al_2017
740	75.478266	64.646129	Loiko_et_al_2017
741	75.45977263	64.64613325	Loiko_et_al_2017
742	75.54889572	64.69226357	Kirpotin_et_al_2011
743	59.518451	67.207928	Kultti_et_al_2004
744	75.465088	64.653135	Loiko_et_al_2017
745	75.46601257	64.65926413	Loiko_et_al_2017
746	72.871921	65.314662	Loiko_et_al_2017
747	72.856143	65.311713	Google_Earth/ArcGIS_Pro	Goncharova_ym._2015
748	72.860837	65.305167	Google_Earth/ArcGIS_Pro	Goncharova_ym._2015
749	72.87918	65.302104	Google_Earth/ArcGIS_Pro	Goncharova_ym._2015
750	72.858322	65.299695	Google_Earth/ArcGIS_Pro	Goncharova_ym._2015
751	72.85645761	65.28993886	Google_Earth/ArcGIS_Pro	Goncharova_ym._2015
752	72.823447	65.303526	Google_Earth/ArcGIS_Pro	Goncharova_ym._2015
753	72.809888	65.294801	Google_Earth/ArcGIS_Pro	Goncharova_ym._2015
754	72.80675658	65.27289276	Google_Earth/ArcGIS_Pro	Goncharova_ym._2015
755	72.84142753	65.28170538	Google_Earth/ArcGIS_Pro	Goncharova_ym._2015
756	62.057181	65.058748	Google_Earth/ArcGIS_Pro	Kirpotin_et_al_2011
757	62.02687047	65.02801886	Google_Earth/ArcGIS_Pro	Kirpotin_et_al_2011
758	62.05177804	65.09069755	Google_Earth/ArcGIS_Pro	Kirpotin_et_al_2011
759	60.696518	65.984168	Google_Earth/ArcGIS_Pro	Kirpotin_et_al_2011
760	60.734893	65.985164	Google_Earth/ArcGIS_Pro	Kirpotin_et_al_2011
761	64.88068	66.144283	Google_Earth/ArcGIS_Pro	Kirpotin_et_al_2011
762	65.15104361	66.33809466	Google_Earth/ArcGIS_Pro	Kirpotin_et_al_2011
763	67.21233776	65.45168036	Google_Earth/ArcGIS_Pro	Kirpotin_et_al_2011
764	67.182219	65.41105	Google_Earth/ArcGIS_Pro	Kirpotin_et_al_2011
765	64.69273875	66.23373135	Google_Earth/ArcGIS_Pro	Terentiva_et_al_2016
766	75.4076277	64.59060829	Google_Earth/ArcGIS_Pro	Terentiva_et_al_2016
767	75.37217643	64.64376578	Google_Earth/ArcGIS_Pro	Terentiva_et_al_2016
768	75.39669623	64.60650049	Google_Earth/ArcGIS_Pro	Terentiva_et_al_2016
769	75.39395857	64.59638373	Google_Earth/ArcGIS_Pro	Terentiva_et_al_2016
770	75.37852416	64.61717931	Google_Earth/ArcGIS_Pro	Terentiva_et_al_2016
771	63.87408167	67.03320137	Google_Earth/ArcGIS_Pro	Vasil'chuk_et_al._2013a
772	63.79734	67.051326	Google_Earth/ArcGIS_Pro	Vasil'chuk_et_al._2013a
773	63.764735	67.059991	Google_Earth/ArcGIS_Pro	Vasil'chuk_et_al._2013a
774	63.64388786	67.08279485	Google_Earth/ArcGIS_Pro	Vasil'chuk_et_al._2013a
775	61.81974803	66.5295236	Google_Earth/ArcGIS_Pro	Vasil'chuk_et_al._2013a
776	61.85225628	66.52974748	Google_Earth/ArcGIS_Pro	Vasil'chuk_et_al._2013a
777	61.83829007	66.51656635	Google_Earth/ArcGIS_Pro	Vasil'chuk_et_al._2013a
778	71.32076601	64.45149323	Google_Earth/ArcGIS_Pro	Terentiva_et_al_2016
779	71.34092031	64.42191014	Google_Earth/ArcGIS_Pro	Terentiva_et_al_2016
780	71.32740524	64.39898333	Google_Earth/ArcGIS_Pro	Terentiva_et_al_2016
781	71.3914244	64.43204594	Google_Earth/ArcGIS_Pro	Terentiva_et_al_2016
782	71.3081221	64.40974333	Google_Earth/ArcGIS_Pro	Terentiva_et_al_2016
783	76.43563453	65.15227097	Google_Earth/ArcGIS_Pro	Terentiva_et_al_2016
784	76.49547684	65.10181899	Google_Earth/ArcGIS_Pro	Terentiva_et_al_2016
785	71.63151794	64.82658406	Google_Earth/ArcGIS_Pro	Terentiva_et_al_2016
786	71.70563363	64.83033836	Google_Earth/ArcGIS_Pro	Terentiva_et_al_2016
787	71.75930227	64.88086994	Google_Earth/ArcGIS_Pro	Terentiva_et_al_2016
788	70.5314506	65.18241992	Google_Earth/ArcGIS_Pro	Terentiva_et_al_2016
789	70.73803771	65.12463004	Google_Earth/ArcGIS_Pro	Terentiva_et_al_2016
790	70.76834489	65.13735041	Google_Earth/ArcGIS_Pro	Terentiva_et_al_2016
791	68.82598612	65.37146283	Google_Earth/ArcGIS_Pro	Terentiva_et_al_2016
792	68.80494621	65.37743149	Google_Earth/ArcGIS_Pro	Terentiva_et_al_2016
793	68.87845367	65.2947883	Google_Earth/ArcGIS_Pro	Terentiva_et_al_2016
794	68.93587287	65.48582954	Google_Earth/ArcGIS_Pro	Terentiva_et_al_2016
795	69.60765743	65.42503235	Google_Earth/ArcGIS_Pro	Terentiva_et_al_2016
796	69.63183521	65.41340472	Google_Earth/ArcGIS_Pro	Terentiva_et_al_2016
797	69.60951921	65.40360393	Google_Earth/ArcGIS_Pro	Terentiva_et_al_2016
798	69.60008137	65.41590214	Google_Earth/ArcGIS_Pro	Terentiva_et_al_2016
799	69.8390224	65.31369781	Google_Earth/ArcGIS_Pro	Terentiva_et_al_2016
800	72.56665716	65.02962883	Google_Earth/ArcGIS_Pro	Terentiva_et_al_2016
801	62.11089042	65.03064245	Google_Earth/ArcGIS_Pro	Kirpotin_et_al_2011
802	62.16004745	65.1142751	Google_Earth/ArcGIS_Pro	Kirpotin_et_al_2011
803	62.14987211	65.08265077	Google_Earth/ArcGIS_Pro	Kirpotin_et_al_2011
804	62.21680006	65.05582133	Google_Earth/ArcGIS_Pro	Kirpotin_et_al_2011
805	62.25049197	65.1275137	Google_Earth/ArcGIS_Pro	Kirpotin_et_al_2011
806	62.40045767	65.13285577	Google_Earth/ArcGIS_Pro	Kirpotin_et_al_2011
807	62.4459302	65.10137955	Google_Earth/ArcGIS_Pro	Kirpotin_et_al_2011
808	62.51259255	65.10919685	Google_Earth/ArcGIS_Pro	Kirpotin_et_al_2011
809	62.58552382	65.14901471	Google_Earth/ArcGIS_Pro	Kirpotin_et_al_2011
810	61.96950198	64.86205445	Google_Earth/ArcGIS_Pro	Kirpotin_et_al_2011
811	62.06867981	64.82706217	Google_Earth/ArcGIS_Pro	Kirpotin_et_al_2011
812	62.04460239	64.79712359	Google_Earth/ArcGIS_Pro	Kirpotin_et_al_2011
813	62.02884446	64.77400879	Google_Earth/ArcGIS_Pro	Kirpotin_et_al_2011
814	61.89025937	64.78792735	Google_Earth/ArcGIS_Pro	Kirpotin_et_al_2011
815	61.9570419	64.66812337	Google_Earth/ArcGIS_Pro	Kirpotin_et_al_2011
816	62.10914003	64.86779514	Google_Earth/ArcGIS_Pro	Kirpotin_et_al_2011
817	62.26291256	65.0237981	Google_Earth/ArcGIS_Pro	Kirpotin_et_al_2011
818	62.65612493	64.97873495	Google_Earth/ArcGIS_Pro	Kirpotin_et_al_2011
819	60.77670475	65.97905622	Google_Earth/ArcGIS_Pro	Kirpotin_et_al_2011
820	60.7368848	66.00358177	Google_Earth/ArcGIS_Pro	Kirpotin_et_al_2011
821	60.7728962	66.00748489	Google_Earth/ArcGIS_Pro	Kirpotin_et_al_2011
822	60.78869762	65.9947353	Google_Earth/ArcGIS_Pro	Kirpotin_et_al_2011
823	60.80307844	65.97516979	Google_Earth/ArcGIS_Pro	Kirpotin_et_al_2011
824	60.89834565	65.97676375	Google_Earth/ArcGIS_Pro	Kirpotin_et_al_2011
825	60.81011726	65.91898828	Google_Earth/ArcGIS_Pro	Kirpotin_et_al_2011
826	60.8496759	65.91413026	Google_Earth/ArcGIS_Pro	Kirpotin_et_al_2011
827	60.88164842	65.91896359	Google_Earth/ArcGIS_Pro	Kirpotin_et_al_2011
828	60.92720019	65.91203996	Google_Earth/ArcGIS_Pro	Kirpotin_et_al_2011
829	60.81998916	65.83085661	Google_Earth/ArcGIS_Pro	Kirpotin_et_al_2011
830	60.95754523	65.94615123	Google_Earth/ArcGIS_Pro	Kirpotin_et_al_2011
831	61.3101315	66.38448315	Google_Earth/ArcGIS_Pro	Kirpotin_et_al_2011
832	61.1281073	66.37784613	Google_Earth/ArcGIS_Pro	Kirpotin_et_al_2011
833	67.09263074	65.39269875	Google_Earth/ArcGIS_Pro	Kirpotin_et_al_2011
834	63.71808903	67.06042938	Google_Earth/ArcGIS_Pro	Vasil'chuk_et_al._2013a
835	63.7125552	67.07581652	Google_Earth/ArcGIS_Pro	Vasil'chuk_et_al._2013a
836	63.80314422	67.0801717	Google_Earth/ArcGIS_Pro	Vasil'chuk_et_al._2013a
837	63.83832382	67.08223829	Google_Earth/ArcGIS_Pro	Vasil'chuk_et_al._2013a
838	63.84397731	67.09203019	Google_Earth/ArcGIS_Pro	Vasil'chuk_et_al._2013a
839	63.86583738	67.10516896	Google_Earth/ArcGIS_Pro	Vasil'chuk_et_al._2013a
840	63.87695285	67.11844068	Google_Earth/ArcGIS_Pro	Vasil'chuk_et_al._2013a
841	63.82944792	67.13546344	Google_Earth/ArcGIS_Pro	Vasil'chuk_et_al._2013a
842	63.91572768	67.14204057	Google_Earth/ArcGIS_Pro	Vasil'chuk_et_al._2013a
843	63.91444415	67.06156334	Google_Earth/ArcGIS_Pro	Vasil'chuk_et_al._2013a
844	63.94610589	67.08725473	Google_Earth/ArcGIS_Pro	Vasil'chuk_et_al._2013a
845	64.04990309	67.04698068	Google_Earth/ArcGIS_Pro	Vasil'chuk_et_al._2013a
846	63.66579188	67.26325422	Vasil'chuk_et_al_2003
847	61.36943859	66.40491468	Vasil'chuk_et_al_2003
848	64.20363975	67.04938312	Vasil'chuk_et_al_2013a
849	64.20518068	67.05439336	Vasil'chuk_et_al_2013a
850	64.28455258	67.05476474	Google_Earth/ArcGIS_Pro
851	64.30378311	67.06841866	Google_Earth/ArcGIS_Pro
852	64.28508052	67.04643021	Google_Earth/ArcGIS_Pro
853	64.16230134	67.07330409	Google_Earth/ArcGIS_Pro
854	64.14028841	67.07309947	Google_Earth/ArcGIS_Pro
855	64.19151495	67.07611344	Google_Earth/ArcGIS_Pro
856	64.22533703	67.07728456	Google_Earth/ArcGIS_Pro
857	61.40438698	66.38522775	Vasil'chuk_et_al_2013a
858	61.68133963	66.5119434	Google_Earth/ArcGIS_Pro
859	61.69707615	66.51017855	Google_Earth/ArcGIS_Pro
860	74.95021468	65.87018562	Kotonatova_et_al_2018
861	64.25011399	67.03973862	Vasil'chuk_et_al_2002
862	64.26886361	67.03604919	Google_Earth/ArcGIS_Pro
863	64.25977169	67.03748286	Google_Earth/ArcGIS_Pro
864	63.78600983	67.05226633	Vasil'chuk_et_al_2002
865	61.77073439	66.53017144	Vasil'chuk_et_al_2002
866	61.78786492	66.53412616	Google_Earth/ArcGIS_Pro
867	61.66659448	66.51527718	Vasil'chuk_et_al_2002
868	61.39661966	66.40377801	Vasil'chuk_et_al_2002
869	61.38615668	66.40537638	Google_Earth/ArcGIS_Pro
870	61.40606166	66.41133804	Google_Earth/ArcGIS_Pro
871	63.67141925	67.26849188	Google_Earth/ArcGIS_Pro
872	64.99658989	64.87927089	Google_Earth/ArcGIS_Pro
873	75.84234965	66.15114793	Google_Earth/ArcGIS_Pro
874	75.83391027	66.1502677	Google_Earth/ArcGIS_Pro
875	75.84800095	66.14893573	Google_Earth/ArcGIS_Pro
876	74.51708292	65.82980886	Google_Earth/ArcGIS_Pro
877	70.96247889	64.79422405	Google_Earth/ArcGIS_Pro
878	70.96372887	64.80071318	Google_Earth/ArcGIS_Pro
879	70.95438618	64.80756847	Google_Earth/ArcGIS_Pro
880	70.99514804	64.80064821	Google_Earth/ArcGIS_Pro
881	70.98687219	64.78756518	Google_Earth/ArcGIS_Pro
882	72.5260161	65.51159699	Google_Earth/ArcGIS_Pro
883	72.47517294	65.52589484	Google_Earth/ArcGIS_Pro
884	72.46840021	65.53002332	Google_Earth/ArcGIS_Pro
885	72.46334588	65.53162653	Google_Earth/ArcGIS_Pro
886	72.46857716	65.53456107	Google_Earth/ArcGIS_Pro
887	72.47953203	65.5190089	Google_Earth/ArcGIS_Pro
888	72.47253539	65.55991782	Google_Earth/ArcGIS_Pro
889	76.52932949	64.45226933	Vasil'chuk_et_al_2012
890	78.919747	67.155074	Glagolev_et_al_2011
891	77.070138	64.459914	Glagolev_et_al_2011
892	77.07572953	64.46492843	Glagolev_et_al_2011
893	77.072747	64.451303	Glagolev_et_al_2011
894	77.095409	64.468811	Glagolev_et_al_2011
895	77.086836	64.463916	Glagolev_et_al_2011
896	78.545899	65.763438	Google_Earth/ArcGIS_Pro
897	78.55179292	65.74851335	Google_Earth/ArcGIS_Pro
898	76.932438	64.347649	Google_Earth/ArcGIS_Pro	Terentiva_et_al_2016
899	76.940498	64.293713	Google_Earth/ArcGIS_Pro	Terentiva_et_al_2016
900	76.8564	64.279203	Google_Earth/ArcGIS_Pro	Terentiva_et_al_2016
901	78.13555973	65.14159564	Google_Earth/ArcGIS_Pro	Terentiva_et_al_2016
902	78.16065458	65.10869484	Google_Earth/ArcGIS_Pro	Terentiva_et_al_2016
903	78.10556847	65.21456936	Google_Earth/ArcGIS_Pro	Terentiva_et_al_2016
904	78.09469035	65.20674897	Google_Earth/ArcGIS_Pro	Terentiva_et_al_2016
905	78.16384511	65.22929279	Google_Earth/ArcGIS_Pro	Terentiva_et_al_2016
906	78.18590023	65.23540447	Google_Earth/ArcGIS_Pro	Terentiva_et_al_2016
907	76.63584585	65.1076865	Google_Earth/ArcGIS_Pro	Terentiva_et_al_2016
908	79.20244263	64.72302247	Google_Earth/ArcGIS_Pro	Terentiva_et_al_2016
909	79.20746914	64.73178748	Google_Earth/ArcGIS_Pro	Terentiva_et_al_2016
910	79.17403249	64.73635076	Google_Earth/ArcGIS_Pro	Terentiva_et_al_2016
911	79.13297297	64.70289564	Google_Earth/ArcGIS_Pro	Terentiva_et_al_2016
912	79.1624099	64.68498176	Google_Earth/ArcGIS_Pro	Terentiva_et_al_2016
913	78.97737201	64.47139617	Google_Earth/ArcGIS_Pro	Terentiva_et_al_2016
914	78.97113775	64.42994328	Google_Earth/ArcGIS_Pro	Terentiva_et_al_2016
915	79.26723324	64.54155832	Google_Earth/ArcGIS_Pro	Terentiva_et_al_2016
916	79.27627771	64.55171841	Google_Earth/ArcGIS_Pro	Terentiva_et_al_2016
917	79.22313705	64.56550438	Google_Earth/ArcGIS_Pro	Terentiva_et_al_2016
918	81.97007388	65.83440532	Google_Earth/ArcGIS_Pro	Terentiva_et_al_2016
919	82.02412248	65.95840106	Google_Earth/ArcGIS_Pro	Terentiva_et_al_2016
920	81.99037016	65.93616558	Google_Earth/ArcGIS_Pro	Terentiva_et_al_2016
921	82.06701754	65.9371373	Google_Earth/ArcGIS_Pro	Terentiva_et_al_2016
922	82.55999677	65.76958058	Google_Earth/ArcGIS_Pro	Terentiva_et_al_2016
923	86.19245358	65.22355721	Google_Earth/ArcGIS_Pro	Terentiva_et_al_2016
924	86.70066691	67.44682581	Google_Earth/ArcGIS_Pro
925	86.70916736	67.44430534	Google_Earth/ArcGIS_Pro
926	82.51388537	65.69196909	Google_Earth/ArcGIS_Pro
927	82.52171997	65.68978396	Google_Earth/ArcGIS_Pro
928	82.52173671	65.69984631	Google_Earth/ArcGIS_Pro
929	76.77504936	64.49456438	Vasil'chuk_et_al_2012
930	76.75859904	64.49210824	Google_Earth/ArcGIS_Pro
931	87.23442897	67.80181456	Vasil'chuk_et_al_2014
932	87.3628806	67.70617088	Vasil'chuk_et_al_2014
933	87.1174771	67.17151583	Vasil'chuk_et_al_2014
934	89.79579628	69.30745607	Google_Earth/ArcGIS_Pro
935	89.81193834	69.31082013	Google_Earth/ArcGIS_Pro
936	89.83783347	69.30053917	Google_Earth/ArcGIS_Pro
937	89.80293866	69.30859075	Vasil'chuk_et_al_2013b
938	87.3825676	68.39295473	Google_Earth/ArcGIS_Pro
939	87.333244	68.39596318	Google_Earth/ArcGIS_Pro
940	87.36279933	68.38940985	Google_Earth/ArcGIS_Pro
941	87.37546789	68.38372528	Vasil'chuk_et_al_2013b
942	152.3441678	59.20541683	Vasil'chuk_et_al_2014
943	148.9817705	59.60133489	Vasil'chuk_et_al_2014
944	178.3823264	63.44815466	Vasil'chuk_et_al_2014
945	152.5938263	62.72497991	Vasil'chuk_et_al_2014
946	158.6948205	55.93668806	Vasil'chuk_et_al_2014
947	89.94525891	51.6928875	Kirpotin_et_al_2022	Kirpotin_et_al_2022
948	90.55519889	69.80122206	Vasil'chuk_2013b
949	87.28524991	69.44184964	Vasil'chuk_2013b
950	87.28851623	69.44044804	Vasil'chuk_2013b
951	87.28918226	69.44403408	Vasil'chuk_2013b
952	86.26647673	69.37899304	Vasil'chuk_2013b
953	86.27167328	69.38123351	Vasil'chuk_2013b
954	87.33783791	68.29967456	Vasil'chuk_2013b
955	87.27061604	68.31698168	Vasil'chuk_2013b
956	87.20881949	68.35736325	Vasil'chuk_2013b
957	87.1639319	68.22643447	Vasil'chuk_2013b
958	87.32360973	68.43041404	Vasil'chuk_2013b
959	101.917639	60.91052498	Google_Earth/ArcGIS_Pro
960	101.3652944	60.76751467	Vasil'chuk_2013a
961	114.2289422	63.54489301	Vasil'chuk_2013a
962	114.1599317	63.53578942	Vasil'chuk_2013a
963	98.85457589	61.05563169	Google_Earth/ArcGIS_Pro
964	98.05877854	61.93547837	Google_Earth/ArcGIS_Pro
965	98.10270617	61.91155147	Google_Earth/ArcGIS_Pro
966	98.08619521	61.90073311	Google_Earth/ArcGIS_Pro
967	98.70745243	61.99761178	Google_Earth/ArcGIS_Pro
968	98.36275311	62.06447279	Google_Earth/ArcGIS_Pro
969	98.34329067	62.06164937	Google_Earth/ArcGIS_Pro
970	98.34608668	62.05698935	Google_Earth/ArcGIS_Pro
971	98.35418935	62.0489488	Google_Earth/ArcGIS_Pro
972	98.34599062	62.0017081	Google_Earth/ArcGIS_Pro
973	98.33326738	61.9899806	Google_Earth/ArcGIS_Pro
