# Supplementary material for: Environmental spaces for palsas and peat plateaus are disappearing at a circumpolar scale
Source: Copernicus journal article supplement (doi:10.5194/tc-17-3157-2023), 2023-08-08
Supplement: Supplementary file 2 [file tc-17-3157-2023-supplement.zip › tc-17-3157-2023-supplement-title-page.pdf]

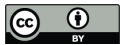

*Supplement of*

**Environmental spaces for palsas and peat plateaus are disappearing at a circumpolar scale**

**Oona Leppiniemi et al.**

*Correspondence to:* Oona Leppiniemi (oona.leppiniemi@oulu.fi)

- tc-17-3157-2023-supplement-title-page.pdf
- Supplementary material.pdf
- Supplementary materials landform observations.csv

The copyright of individual parts of the supplement might differ from the article licence.
